# Supplementary material for: In Silico Integrated Analysis of Genomic, Transcriptomic, and Proteomic Data Reveals QTL-Specific Genes for Bacterial Canker Resistance in Tomato (Solanum lycopersicum L.)
Source: MDPI journal article supplement (doi:10.3390/cimb45020090), 2023-02-06
Supplement: s1 [file s1]

Table S1. Details of studies performed QTL mapping for *Cmm* resistance.

| Origin of resistance               | Population                              | Marker system | Bacterial race                              | QTL method                       | No. of QTLs | Chromosome             | Reference                  |
|------------------------------------|-----------------------------------------|---------------|---------------------------------------------|----------------------------------|-------------|------------------------|----------------------------|
| <i>S. arcanum</i> (LA2157)         | Three Reciprocal backcross populations  | RFLP          | <i>Cmm542</i>                               | Kruskal-Wallis rank-sum test     | 5           | T1, T6, T7,T8 and T10  | Sandbrink et al. (1995)    |
| <i>S. arcanum</i> LA2157           | F2                                      | RFLP-SCAR     | <i>Cmm542</i>                               | Kruskal-Wallis rank-sum test     | 3           | T5, T7 and T9          | Van Heusden et al. 1999    |
| <i>S. habrochaites</i> LA407       | Segregating population derived from IBL | RFLP          | <i>Cmm</i> A226 and <i>C290</i>             | Composite interval mapping (CIM) | 2           | T2 and T5              | Coaker and Francis. (2004) |
| <i>S. pimpinellifolium</i> GI.1554 | RIL                                     | SNP           | <i>Cmm542</i> unidentified rice from Turkey | Composite interval mapping (CIM) | 18          | T1, T2, T7, T8 and T12 | Sen (2014)                 |

Table S2. Studies identified differentially expressed genes during *Cmm* infection.

| Origin of resistance                                                                            | method     | <i>Cmm</i> strain | Reference            |
|-------------------------------------------------------------------------------------------------|------------|-------------------|----------------------|
| <i>S. lycopersicum</i> (Rio Grande; Nr mutant and its background lines Pearson and Ailsa Craig) | microarray | <i>Cmm</i> 42     | Balaji et al. (2008) |
| <i>S. habrochaites</i> LA2128                                                                   | cDNA-AFLP  | <i>Cmm</i> 191    | Lara-Ávila, (2012)   |
| <i>S. habrochaites</i>                                                                          | ESI-MS/MS  | C290              | Coaker et al (2004)  |

Table S3. Physical mapping of RFLP probe sequences associated with *Cmm* resistance reported by Sandbrink et al. (1995).

| RFLP-probe | Chromosome | % identity | Alignment length | mismatches | gap opens | Probe start | Probe End | Chr. position start | Chr. position end | E-value  | Bit score |
|------------|------------|------------|------------------|------------|-----------|-------------|-----------|---------------------|-------------------|----------|-----------|
| TG103      | T10        | 99.796     | 490              | 1          | 0         | 38          | 527       | 57572715            | 57572226          | 0        | 900       |
| TG128      | T07        | 100        | 506              | 0          | 0         | 1           | 506       | 62486444            | 62485939          | 0        | 935       |
| TG165      | T02        | 99.376     | 481              | 3          | 0         | 1           | 481       | 35820075            | 35819595          | 0        | 872       |
| TG170      | T07        | 100        | 522              | 0          | 0         | 1           | 522       | 62734671            | 62735192          | 0        | 965       |
| TG174      | T07        | 100        | 457              | 0          | 0         | 1           | 457       | 59483951            | 59483495          | 0        | 845       |
| TG178      | T06        | 97.645     | 467              | 4          | 1         | 1           | 467       | 22112109            | 22112568          | 0        | 795       |
| TG20A      | T07        | 100        | 502              | 0          | 0         | 1           | 502       | 65632413            | 65632914          | 0        | 928       |
| TG210      | T07        | 100        | 159              | 0          | 0         | 1           | 159       | 30282312            | 30282470          | 1.96E-78 | 294       |
| TG223A     | T09        | 100        | 465              | 0          | 0         | 1           | 465       | 2816764             | 2817228           | 0        | 859       |
| TG261      | T08        | 100        | 491              | 0          | 0         | 1           | 491       | 58596385            | 58596875          | 0        | 907       |
| TG307      | T08        | 100        | 538              | 0          | 0         | 10          | 547       | 56177921            | 56178458          | 0        | 994       |
| TG34       | T02        | 100        | 607              | 0          | 0         | 1           | 607       | 49197691            | 49198297          | 0        | 1122      |
| TG35       | T09        | 100        | 511              | 0          | 0         | 1           | 511       | 62387893            | 62387383          | 0        | 944       |
| TG353      | T02        | 99.248     | 532              | 4          | 0         | 1           | 532       | 42997178            | 42997709          | 0        | 961       |
| TG41       | T08        | 99.479     | 576              | 0          | 3         | 2           | 574       | 53832322            | 53831747          | 0        | 1044      |
| TG59       | T01        | 99.07      | 430              | 3          | 1         | 6           | 435       | 77441598            | 77441170          | 0        | 771       |
| TG61       | T07        | 100        | 412              | 0          | 0         | 2           | 413       | 3565619             | 3566030           | 0        | 761       |
| TG9        | T09        | 100        | 504              | 0          | 0         | 1           | 504       | 1942009             | 1942512           | 0        | 931       |

Table S4. QTLs identified based on physical map of RFLP probes reported by Sandbrink et al. (1995).

| QTLs    | QTL interval          | QTL size<br>(Mb) | Flanking markers |
|---------|-----------------------|------------------|------------------|
| QTL1.1  | Single marker         | 0.00             | TG59             |
| QTL2.1  | Single marker         | 0.00             | TG165            |
| QTL2.2  | 42.997178 - 49.197691 | 6.20             | TG353-TG34       |
| QTL7.1  | Single marker         | 0.00             | TG61             |
| QTL7.2  | Single marker         | 0.00             | TG210            |
| QTL7.3  | 59.483951-65.632413   | 6.15             | TG174- TG20A     |
| QTL8.1  | 53.832322 - 58.596385 | 4.76             | TG41-TG261       |
| QTL9.1  | 1.942009 - 2.816764   | 0.87             | TG9-TG223A       |
| QTL9.2  | Single marker         | 0.00             | TG35             |
| QTL10.1 | Single marker         | 0.00             | TG103            |

Table S5. Gene set enrichment analysis of mapped QTLs.

| Meta<br>QTLs | chromosome | Resistance<br>origin                    | Start<br>position<br>(bp) | End<br>position<br>(bp) | Size | No.<br>of<br>genes | No. of genes<br>had known<br>function | % of<br>known<br>function | number of<br>disease<br>resistance<br>genes | Genes had disease resistance function                                                                                                                                                                                                                        |
|--------------|------------|-----------------------------------------|---------------------------|-------------------------|------|--------------------|---------------------------------------|---------------------------|---------------------------------------------|--------------------------------------------------------------------------------------------------------------------------------------------------------------------------------------------------------------------------------------------------------------|
| mQTL2.2      | 2          | <i>Solanum arcuatum</i> S. habrochaites | 42997178                  | 49197691                | 6.2  | 836                | 540                                   | 64.59                     | 4                                           | (Solyc02g082740.1.1, Solyc02g084610.1.1, Solyc02g084600.4 and Solyc02g084610.1)                                                                                                                                                                              |
| Rcm2         | 2          | <i>Solanum arcuatum</i> S. habrochaites | 49089879                  | 50189289                | 1.1  | 139                | 124                                   | 89.21                     | 0                                           |                                                                                                                                                                                                                                                              |
| Rcm5.1       | 5          | <i>Solanum arcuatum</i> S. habrochaites | 59858052                  | 61457155                | 1.6  | 140                | 67                                    | 47.86                     | 4                                           | Solyc05g051200.1.1, Solyc05g051310.1.1, Solyc05g050830.3 and Solyc05g050790.3                                                                                                                                                                                |
| mQTL7.1      | 7          | <i>Solanum arcuatum</i> S. habrochaites | 484118                    | 3565619                 | 3.08 | 303                | 213                                   | 70.30                     | 11                                          | Solyc07g006700.1.1, Solyc07g007740.1.1, Solyc07g007750.3, Solyc07g007730.4, Solyc07g007735.1, Solyc07g007710.4, Solyc07g007755.1, Solyc07g008373.1, Solyc07g008377.1, Solyc07g008375.1 and Solyc07g006710.2                                                  |
| mQTL7.3      | 7          | <i>Solanum arcuatum</i> S. habrochaites | 59483951                  | 65632413                | 6.15 | 674                | 560                                   | 83.09                     | 14                                          | Solyc07g056600.1.1, Solyc07g150139.1, Solyc07g053010.3, Solyc07g053020.3, Solyc07g049700.1, Solyc07g052785.1, Solyc07g052800.3, Solyc07g055620.2, Solyc07g055610.3, Solyc07g052770.2, Solyc07g055380.1, Solyc07g052790.3, Solyc07g052780.3, Solyc07g055390.1 |
| mQTL8.1      | 8          | <i>Solanum arcuatum</i> S. habrochaites | 53832322                  | 58596385                | 4.76 | 435                | 397                                   | 91.26                     | 7                                           | Solyc08g068360.1.1, Solyc08g067380.1, Solyc08g074250.3, Solyc08g075980.2, Solyc08g075630.3, Solyc08g075640.4, Solyc08g076000.4                                                                                                                               |
| mQTL9.1      | 9          | <i>Solanum arcuatum</i> S. habrochaites | 85353                     | 2816764                 | 2731 | 313                | 282                                   | 90.10                     | 8                                           | Solyc09g007010.1.1 and Solyc09g007020.1.1 Solyc09g009240.1.1, Solyc09g005490.1.1, Solyc09g005950.3, Solyc09g006005.1, Solyc09g007010, Solyc09g007020.1                                                                                                       |

Table S6. Tblastn search of protein sequences had *Cmm* resistance function reported by Lara-Ávila et al (2012).

| Gene           | chromosome | % identity | alignment length | mismatches | gap opens | Query start | Query end | chr. start | chr. end | e-value   | Bit score |
|----------------|------------|------------|------------------|------------|-----------|-------------|-----------|------------|----------|-----------|-----------|
| ABB90047.1     | T00        | 96.99      | 133              | 4          | 0         | 1           | 133       | 2541421    | 2541819  | 7.49E-79  | 256       |
| BAA10929.1     | T00        | 82.33      | 266              | 38         | 5         | 1           | 260       | 6360040    | 6359252  | 1.10E-105 | 352       |
| CAA63432.1     | T01        | 95.82      | 383              | 16         | 0         | 1           | 383       | 1042254    | 1041106  | 0         | 772       |
| P23322.2       | T02        | 98.82      | 255              | 3          | 0         | 75          | 329       | 34603225   | 34603989 | 2.32E-164 | 511       |
| ABB86276.1     | T02        | 97.87      | 47               | 1          | 0         | 278         | 324       | 48739848   | 48739988 | 4.05E-88  | 95.1      |
| AAD33072.1     | T02        | 94.85      | 136              | 7          | 0         | 191         | 326       | 42723280   | 42722873 | 9.66E-135 | 275       |
| ABY21255.1     | T02        | 83.67      | 49               | 7          | 1         | 13          | 61        | 46721678   | 46721821 | 8.57E-78  | 82        |
| AAA34192.1     | T02        | 79.33      | 150              | 2          | 1         | 60          | 180       | 46730615   | 46731064 | 8.61E-84  | 244       |
| CAK24966.1     | T03        | 97.73      | 44               | 1          | 0         | 208         | 251       | 59914563   | 59914694 | 1.31E-135 | 92        |
| NP_001148439.1 | T03        | 87.64      | 267              | 30         | 1         | 1           | 264       | 547508     | 548308   | 1.14E-151 | 471       |
| BAG80553.1     | T03        | 76.72      | 451              | 103        | 2         | 5           | 454       | 15870044   | 15871393 | 0         | 683       |
| ACH68563.1     | T04        | 90.37      | 353              | 4          | 1         | 107         | 429       | 59981606   | 59982664 | 0         | 610       |
| NP_564149.1    | T04        | 76.19      | 42               | 10         | 0         | 64          | 105       | 2872403    | 2872528  | 3.12E-13  | 71.6      |
| AAO66472.1     | T05        | 100.00     | 36               | 0          | 0         | 23          | 58        | 65017858   | 65017965 | 2.99E-15  | 80.1      |
| ABB72805.1     | T06        | 79.00      | 100              | 19         | 1         | 245         | 342       | 22480227   | 22480526 | 1.42E-43  | 164       |
| AAK52801.1     | T07        | 94.92      | 59               | 3          | 0         | 365         | 423       | 66512336   | 66512512 | 5.72E-64  | 87.4      |
| ACH54085.1     | T07        | 93.75      | 48               | 3          | 0         | 297         | 344       | 24010224   | 24010367 | 7.68E-37  | 95.1      |
| ACG60665.1     | T07        | 89.41      | 85               | 9          | 0         | 149         | 233       | 66168922   | 66169176 | 1.06E-25  | 108       |
| AAB37246.1     | T07        | 85.71      | 14               | 2          | 0         | 1           | 14        | 1671041    | 1671082  | 7.72E-137 | 27.7      |
| BAG16520.1     | T08        | 92.17      | 115              | 9          | 0         | 963         | 1077      | 1439016    | 1438672  | 6.47E-87  | 220       |
| ABC01888.1     | T08        | 85.71      | 42               | 6          | 0         | 141         | 182       | 48263857   | 48263982 | 4.21E-32  | 75.5      |
| EEF34729.1     | T08        | 84.21      | 95               | 15         | 0         | 606         | 700       | 58701556   | 58701840 | 8.74E-43  | 173       |
| Q76CU2.1       | T08        | 62.07      | 232              | 57         | 1         | 444         | 644       | 54718024   | 54718719 | 0         | 305       |
| ACC68681.1     | T08        | 54.67      | 75               | 23         | 3         | 202         | 267       | 52199457   | 52199239 | 3.28E-61  | 75.9      |
| ABK41200.1     | T09        | 97.84      | 139              | 3          | 0         | 1           | 139       | 37242955   | 37242539 | 1.38E-71  | 236       |
| ACC66148.3     | T09        | 94.90      | 98               | 5          | 0         | 605         | 702       | 1549580    | 1549873  | 3.62E-50  | 196       |
| EEF32044.1     | T09        | 94.12      | 34               | 2          | 0         | 280         | 313       | 3438392    | 3438291  | 1.44E-26  | 65.9      |

|          |     |       |     |    |   |     |     |          |          |           |     |
|----------|-----|-------|-----|----|---|-----|-----|----------|----------|-----------|-----|
| Q05538.1 | T10 | 79.54 | 215 | 17 | 1 | 135 | 322 | 56492366 | 56491722 | 5.67E-138 | 348 |
| O49074.1 | T10 | 74.30 | 393 | 23 | 5 | 118 | 432 | 64515144 | 64513966 | 1.44E-178 | 558 |
| P32980.1 | T12 | 89.20 | 250 | 25 | 1 | 1   | 248 | 62527570 | 62528319 | 6.66E-122 | 385 |
